# Supplementary material for: SPECT/NIRF Dual Modality Imaging for Detection of Intraperitoneal Colon Tumor with an Avidin/Biotin Pretargeting System
Source: PubMed Central journal article supplement (PMC4702112; doi:10.1038/srep18905), 2016-01-06
Supplement: srep18905-s1.pdf [file srep18905-s1.pdf]

# **SPECT/NIRF Dual Modality Imaging for Detection of Intraperitoneal Colon Tumor with an Avidin/Biotin Pretargeting System**

**Chengyan Dong<sup>1,2,+</sup>, Sujuan Yang<sup>1,+</sup>, Jiyun Shi<sup>2</sup>, Huiyun Zhao<sup>1,3</sup>, Lijun Zhong<sup>3</sup>,  
Zhaofei Liu<sup>1</sup>, Bing Jia<sup>1\*</sup>, and Fan Wang<sup>1,2,4</sup>**

<sup>1</sup> Medical Isotopes Research Center and Department of Radiation Medicine, School of Basic Medical Sciences, Peking University, Beijing 100191, China

<sup>2</sup> Interdisciplinary Laboratory, Institute of Biophysics, Chinese Academy of Sciences, Beijing 100101, China

<sup>3</sup> Medical and Healthy Analytical Center, Peking University, Beijing 100191, China

<sup>4</sup> State Key Laboratory of Natural and Biomimetic Drugs, Center for Molecular and Translational Medicine, Peking University, Beijing 100191, China

+ These authors contributed equally to this work

\* Corresponding author: Dr. Bing Jia, Medical Isotopes Research Center, Peking University, 38# Xueyuan Road, Beijing 100191, P. R. China. Phone: +86-10-82802871; Fax: +86-10-82801145; Email: [jiabing@bjmu.edu.cn](mailto:jiabing@bjmu.edu.cn).

## Supplementary information

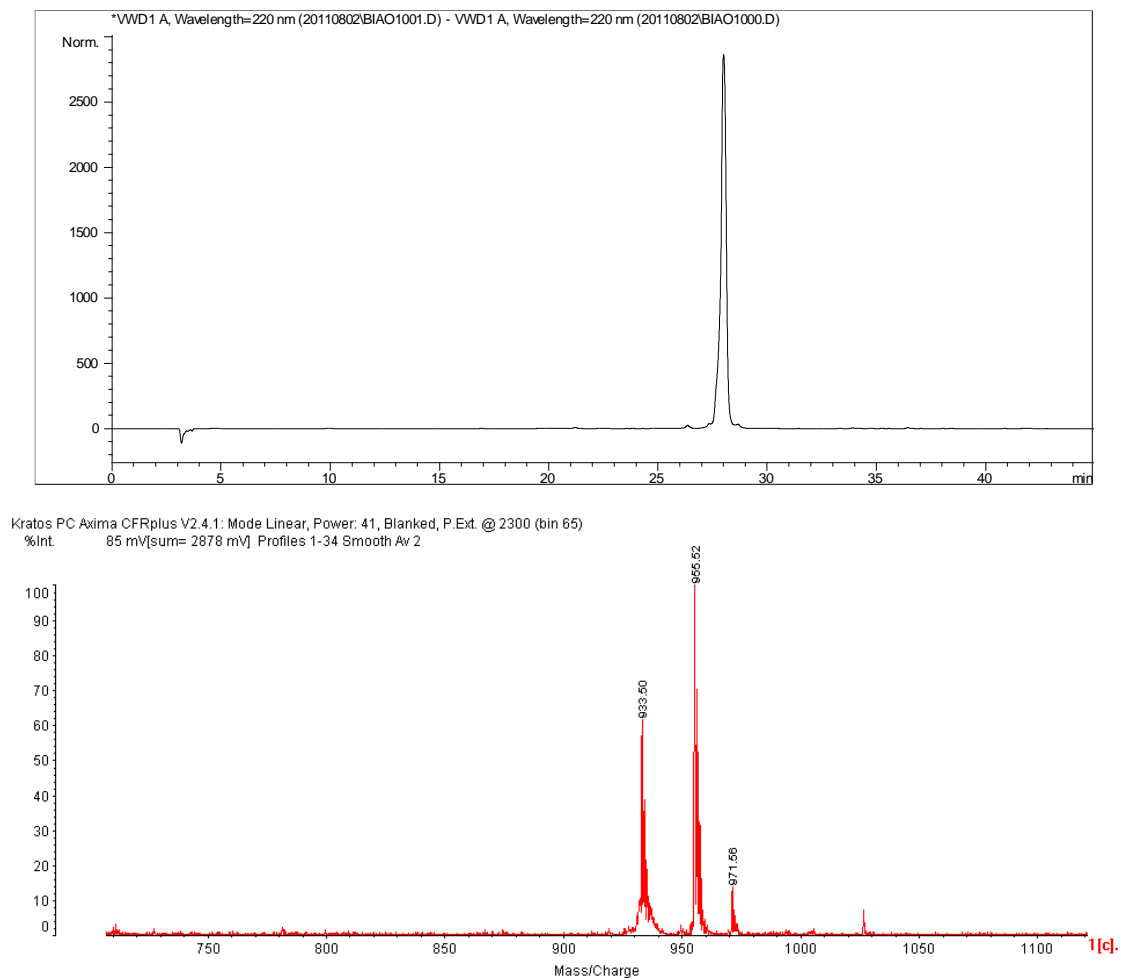

**SFigure.1 HPLC and MS analysis of Biotin-PEG4-lysine(Dde)-Fmoc. HPLC analysis (C18 column):  $t_R = 28.2$  min, purity > 95%. MALDI-TOF-MS:  $[M+H]^+$  m/z 933.5 (calc 933.5);  $[M+Na]^+$  m/z 955.5 (calc 955.5);  $[M+K]^+$  m/z 971.6 (calc 971.5); MW : 932.5 Yield: 52.1 %.**

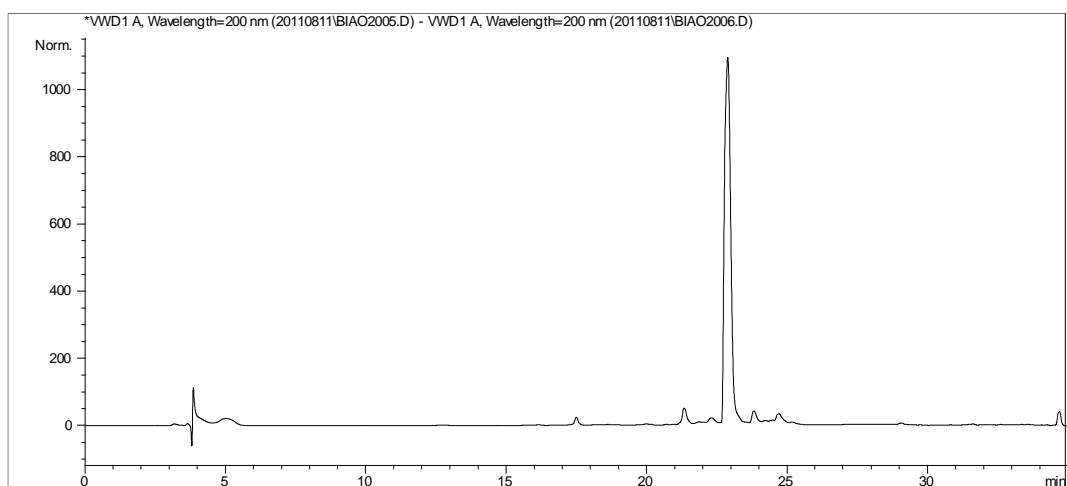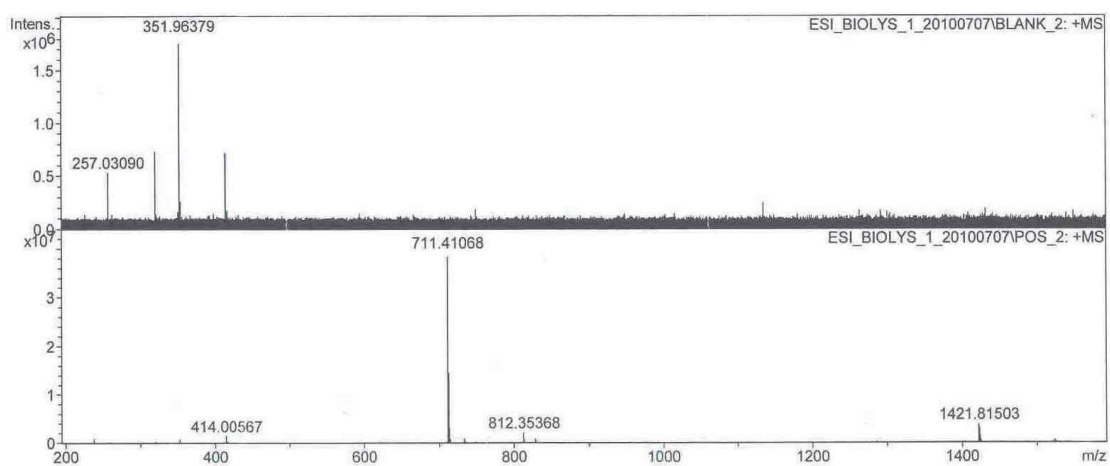

**Figure.2 HPLC and MS analysis of Biotin-PEG4-lysine(Dde)-NH<sub>2</sub>. HPLC analysis (C18 column): *t*R = 23.0 min, purity > 95%. ESI-MS: [M+H]<sup>+</sup> m/z 711.4 (calc 711.4); MW : 711.4; Yield: 82.9 %.**

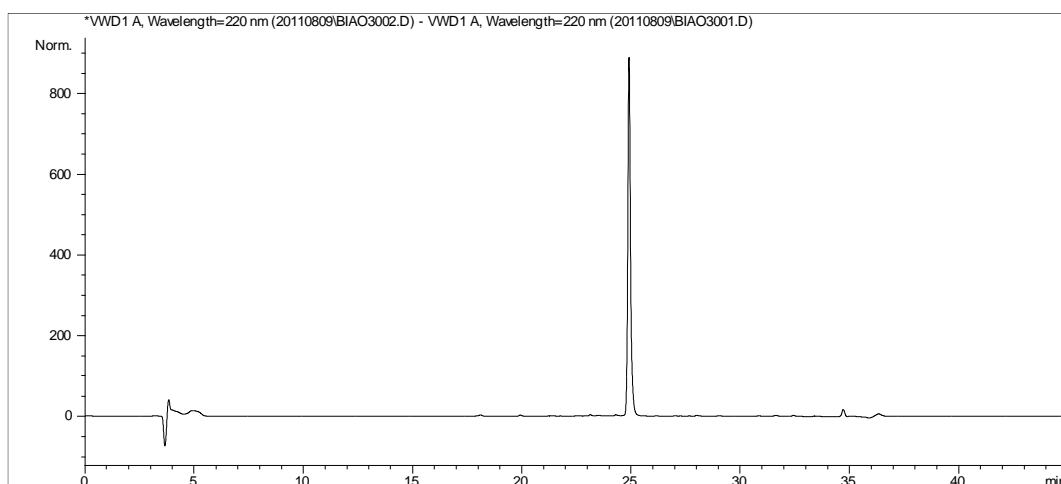

Kratos PC Axima CFRplus V2.4.1: Mode Linear, Power: 38, Blanked, P.Ext. @ 2300 (bin 65)  
 %Int. 443 mV[sum= 7096 mV] Profiles 36-51 Smooth Av 2

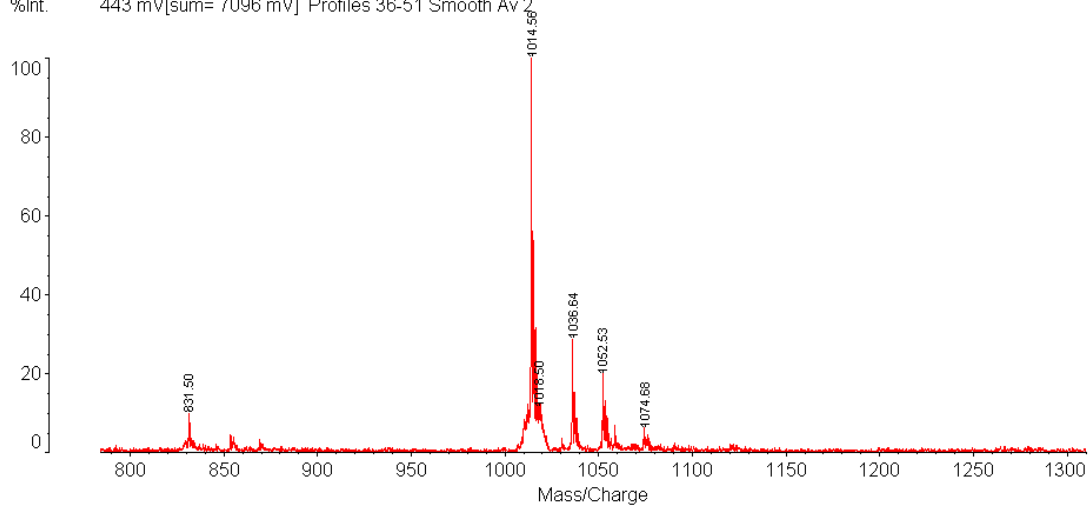

**SFigure.3 HPLC and MS analysis of Biotin-PEG4-lysine(Dde)-HYNIC. HPLC analysis (C18 column):  $t_R = 24.9$  min, purity > 95%. MALDI-TOF-MS:  $[M+H]^+$  m/z 1014.6 (calc 1014.4);  $[M+Na]^+$  m/z 1036.6 (calc 1036.4);  $[M+K]^+$  m/z 1052.5 (calc 1052.4); MW : 1013.4 Yield: 58.2 %.**

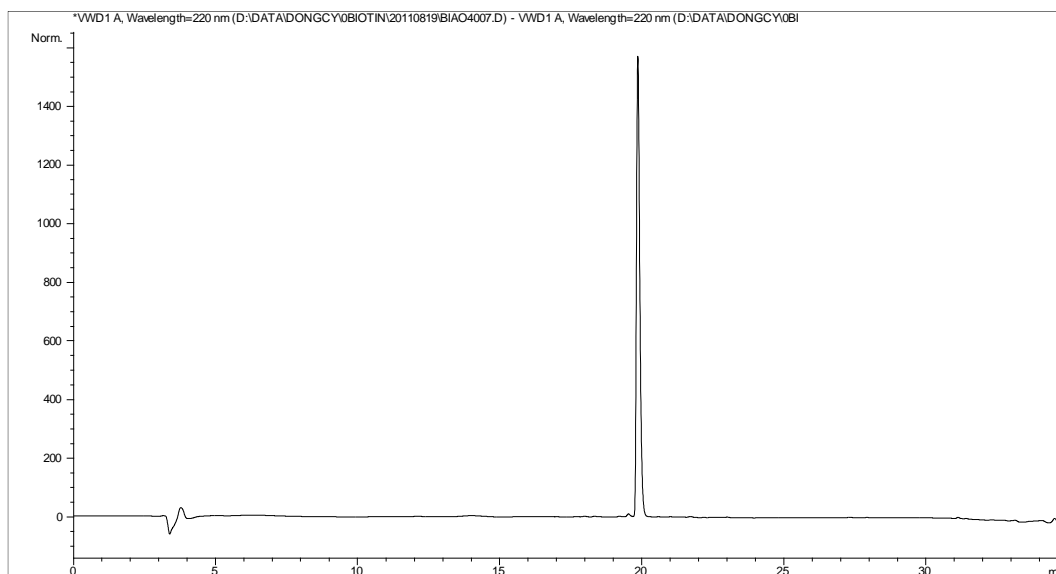

Kratos PC Axima CFRplus V2.4.0: Mode Linear, Power: 38, Blanked, P.Ext. @ 2300 (bin 65)  
 %Int. 558 mV[sum= 10605 mV] Profiles 15-33 Smooth Av. 2

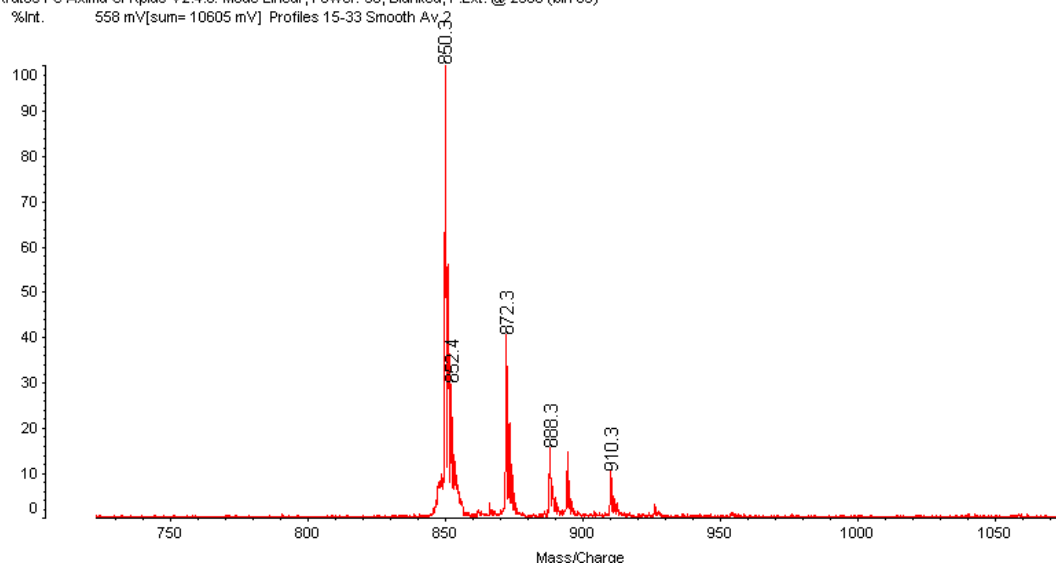

**Figure.4 HPLC and MS analysis of Biotin-PEG4-lysine(NH<sub>2</sub>)-HYNIC. HPLC analysis (C18 column): *t*R = 20.1 min, purity > 95%. MALDI-TOF-MS: [M+H]<sup>+</sup> m/z 850.3 (calc 850.3); [M+Na]<sup>+</sup> m/z 872.3 (calc 872.3); [M+K]<sup>+</sup> m/z 888.3 (calc 888.3); MW : 849.3; Yield: 87.0 %.**

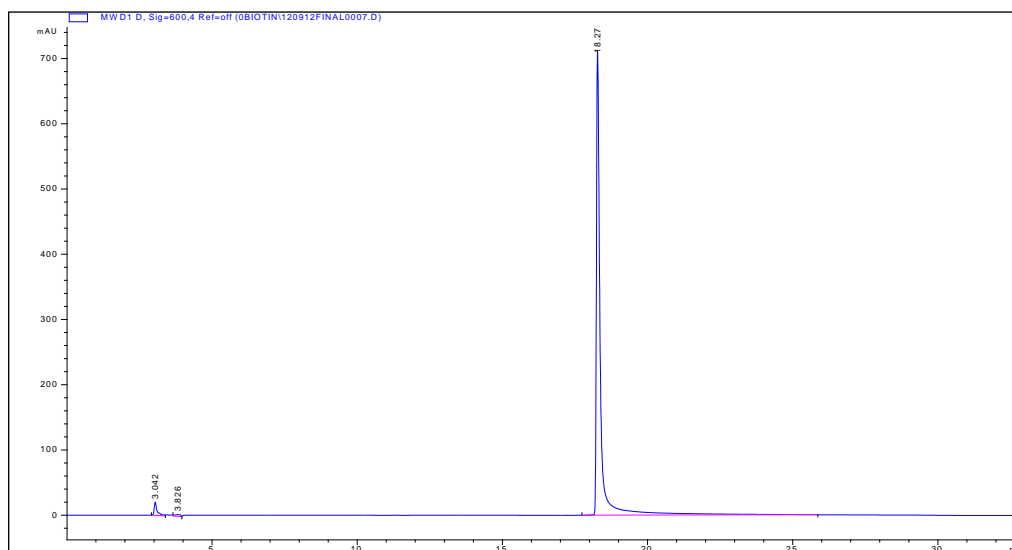

Kratos PC Axima CFRplus V2.4.1: Mode Linear, Power: 46, Blanked, P.Ext. @ 1500 (bin 53)  
 %Int. 33 mV[sur= 759 mV] Profiles 1-23 Smooth Av 2

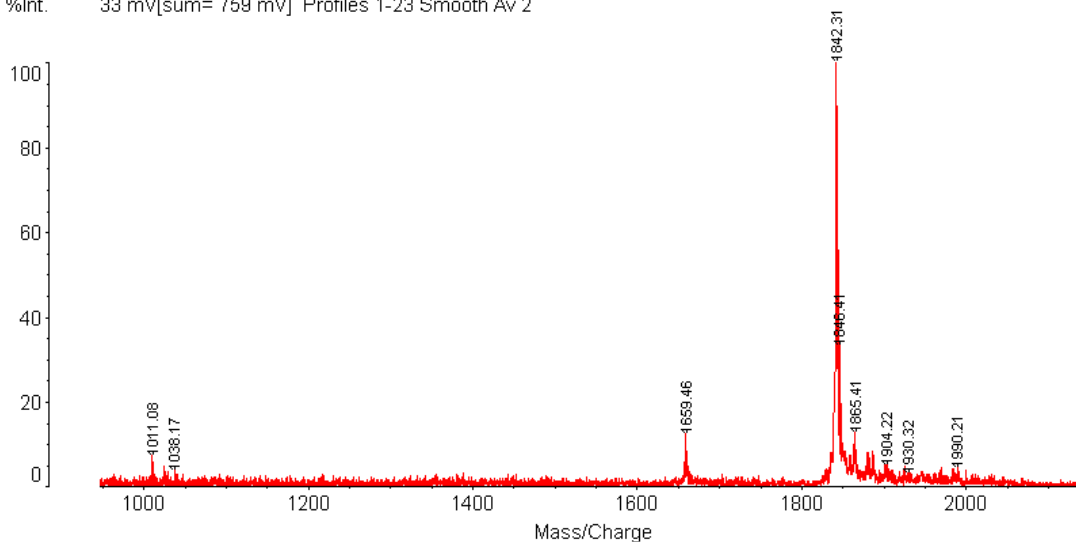

**Figure.5 HPLC and MS analysis of Biotin-PEG4-lysine(Cy5.5)-HYNIC. HPLC analysis (C18 column): *t*R = 18.6 min, purity > 95%. MALDI-TOF-MS: [M+H]<sup>+</sup> m/z 1842.3 (calc 1838.0); MW : 1838.0; Yield: 52.1 %.**

|                 | 1 h         | 2 h          | 4 h          |
|-----------------|-------------|--------------|--------------|
| Tumor/Blood     | 8.58 ± 1.93 | 19.28 ± 3.63 | 21.46 ± 5.78 |
| Tumor/Heart     | 9.35 ± 1.06 | 16.62 ± 2.35 | 11.43 ± 4.59 |
| Tumor/Lung      | 2.79 ± 0.39 | 4.88 ± 0.41  | 4.60 ± 1.93  |
| Tumor/Kidney    | 0.12 ± 0.03 | 0.10 ± 0.02  | 0.07 ± 0.04  |
| Tumor/Liver     | 2.62 ± 1.11 | 4.49 ± 1.02  | 2.37 ± 1.38  |
| Tumor/Spleen    | 4.06 ± 1.11 | 7.26 ± 1.53  | 6.86 ± 2.75  |
| Tumor/Intestine | 2.22 ± 0.42 | 5.71 ± 1.62  | 4.46 ± 0.97  |
| Tumor/Stomach   | 2.47 ± 1.40 | 3.97 ± 0.51  | 2.78 ± 1.17  |
| Tumor/Bone      | 5.71 ± 1.45 | 10.46 ± 0.61 | 7.35 ± 2.05  |
| Tumor/Muscle    | 7.20 ± 1.57 | 9.05 ± 3.18  | 9.20 ± 2.48  |

**STable.1 Tumor-to-normal organ ratios of <sup>99m</sup>Tc-HYNIC-lys(Cy5.5)-PEG<sub>4</sub>-biotin at 1, 2, and 4 hours after pretargeted injection of avidin into nude mice bearing LS180 colon tumors.**
